# Supplementary material
Source: HighWire-hosted journal article supplement (https://jnm.snmjournals.org/highwire/filestream/94315/field_highwire_adjunct_files/0/96685_Supplemental_Data.pdf)
Supplement: 96685_Supplemental_Data.pdf [file 96685_Supplemental_Data.pdf]

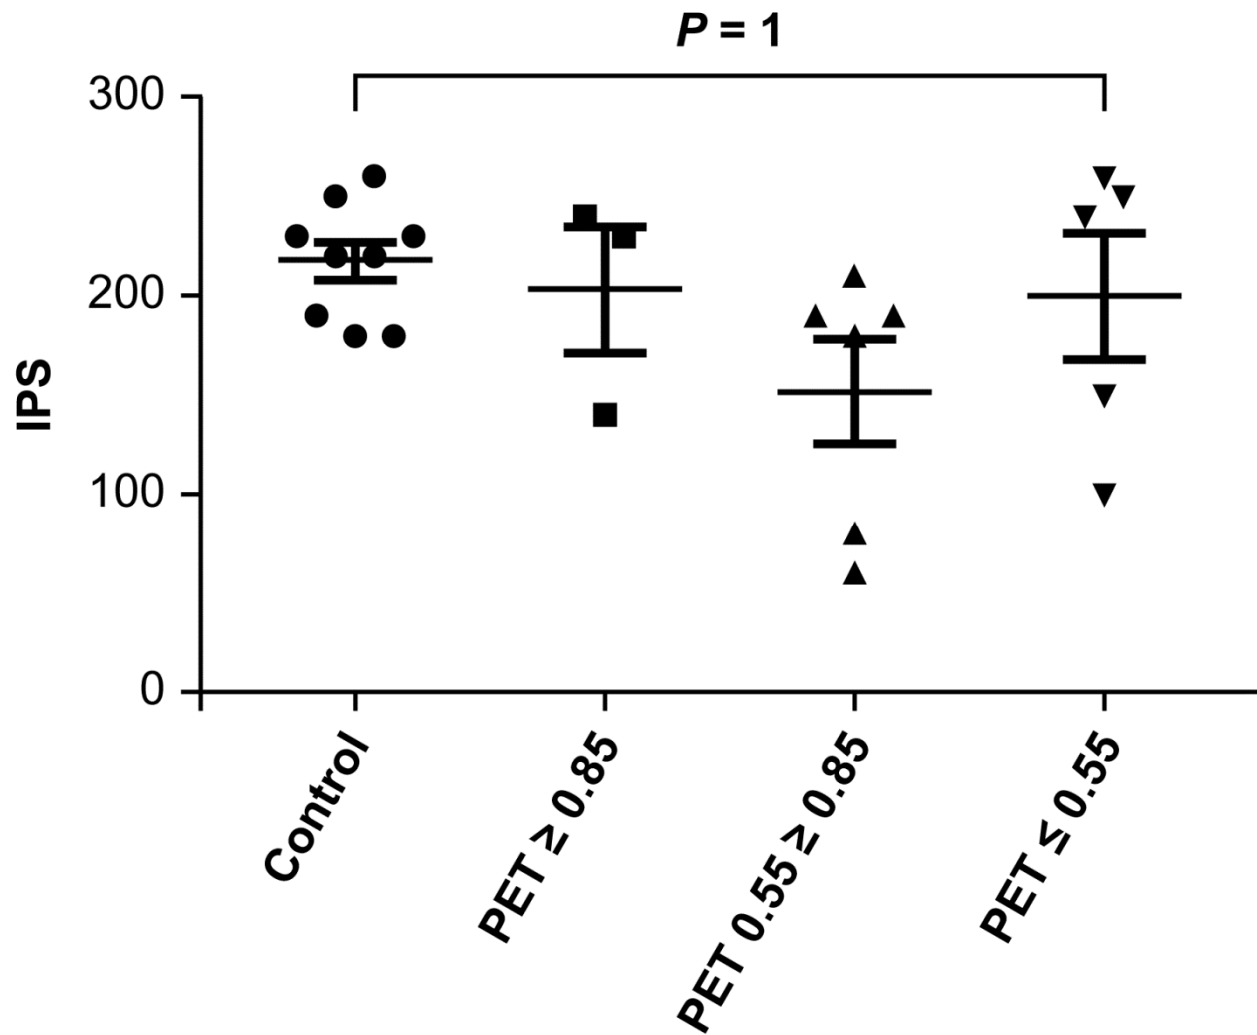

**Supplemental Figure 1.** The relationship between IPS scoring and tracer uptake (control vs. PET  $0.55 \leq 0.85$   $p = 0.037$ ; control vs. PET  $\leq 0.55$ ;  $p = 1$ ).
